# Supplementary material
Source: bioRxiv or medRxiv preprint supplement (https://www.biorxiv.org/highwire/filestream/5798/field_highwire_adjunct_files/0/022020-1.pdf)
Supplement: Supplementary file [file 022020-1.pdf]

# 1 **S1 General notes on the analysis**

2 Major parts of the analysis are based on branching process approximations. We model the  
3 number of double mutants (and occasionally also the number of single mutants) in the stand-  
4 ing genetic variation by a subcritical branching process with immigration, where “immigra-  
5 tion” happens through mutation or recombination. For the establishment probability of a type  
6  $AB$  individual, we apply results from the theory of time-homogeneous or time-inhomogeneous  
7 single-type branching processes. In order to determine the probability that a type  $Ab$  individual  
8 gives rise to a permanent lineage of  $AB$  individuals by mutation, we use a two-type branching  
9 process. Although the model is formulated in discrete time, we resort to branching processes  
10 in continuous time for the mathematical analysis. In the following, we first state some gen-  
11 eral mathematical results from branching process theory. We thereafter apply them to derive  
12 some building blocks that we use repeatedly in the subsequent analysis in Appendix S2 and  
13 Appendix S3.

## 14 **S1.1 Mathematical results from branching process theory**

15 **Probability generating function for the number of individuals in a subcritical single**  
16 **type branching process with immigration** Following SEWASTJANOW (1974, p. 163), we  
17 can calculate the probability generating function (p.g.f.) for the number of individuals in a  
18 subcritical branching process with immigration. Individuals reproduce at rate  $\lambda$  and die at  
19 rate  $\mu$ . Immigration happens at rate  $m$ . We define the two infinitesimal generating functions

$$f(y) = \mu - (\lambda + \mu)y + \lambda y^2, \quad (\text{S1.1a})$$

$$g(y) = -m + my. \quad (\text{S1.1b})$$

20 Let  $P_k$  be the probability to have  $k$  individuals in the limit  $t \rightarrow \infty$  and

$$F(y) = \sum_{k=0}^{\infty} P_k y^k \quad (\text{S1.2})$$

21 It then holds

$$\begin{aligned} F(y) &= \exp \left[ \int_y^1 \frac{g(x)}{f(x)} dx \right] \\ &= \left( \frac{\lambda - \mu}{y\lambda - \mu} \right)^{\frac{m}{\lambda}}. \end{aligned} \quad (\text{S1.3})$$

22 For  $\lambda = \frac{1}{2} + \frac{\sigma}{2}$  and  $\mu = \frac{1}{2} - \frac{\sigma}{2}$ , this gives

$$F(y) = \left( \frac{2\sigma}{y + y\sigma + \sigma - 1} \right)^{\frac{2m}{1+\sigma}}. \quad (\text{S1.4})$$

23 From the p.g.f., the stationary distribution of the number of individuals can be obtained as

$$P_k = \frac{1}{k!} \frac{d}{dy} F(y) \Big|_{y=0} = \frac{1}{k!} \left( \frac{2\sigma}{\sigma - 1} \right)^{\frac{2m}{\sigma+1} + k} \cdot \prod_{i=1}^k \frac{2m + (i-1)(1+\sigma)}{(-2\sigma)} \quad (\text{S1.5})$$

24 for  $k > 0$  and  $P_0 = F(0)$ .

25 **Establishment probability of a reducible two-type branching process** Consider a  
 26 branching process with two types. Type  $i$  reproduces at rate  $\lambda_i$  and dies at rate  $\mu_i$ . Type 2  
 27 turns into type 1 at rate  $u_{\text{eff}}$ .

28 The survival probability of a process founded by one individual of type 1 is given by (ALLEN,  
 29 2011, p. 253)

$$p_{\text{est}}^{(1)} = \begin{cases} \frac{\lambda_1 - \mu_1}{\lambda_1} & \text{if } \lambda_1 > \mu_1, \\ 0 & \text{else.} \end{cases} \quad (\text{S1.6})$$

30 The establishment probability of a process founded by a single individual of type 2 can be  
 31 obtained by solving the equation

$$1 - p_{\text{est}}^{(2)} = \frac{\mu_2}{\lambda_2 + \mu_2 + u_{\text{eff}}} + \frac{u_{\text{eff}}}{\lambda_2 + \mu_2 + u_{\text{eff}}}(1 - p_{\text{est}}^{(1)}) + \frac{\lambda_2}{\lambda_2 + \mu_2 + u_{\text{eff}}}(1 - p_{\text{est}}^{(2)})^2, \quad (\text{S1.7})$$

32 where the smaller root has to be taken (UECKER *et al.*, 2015):

$$\begin{aligned} p_{\text{est}}^{(2)} &= 1 - \frac{\lambda_2 + \mu_2 + u_{\text{eff}} - \sqrt{(\lambda_2 + \mu_2 + u_{\text{eff}})^2 - 4(u_{\text{eff}}(1 - p_{\text{est}}^{(1)}) + \mu_2)\lambda_2}}{2\lambda_2} \\ &= 1 - \frac{\lambda_2 + \mu_2 + u_{\text{eff}} - \sqrt{(\lambda_2 - \mu_2 - u_{\text{eff}})^2 + 4\lambda_2 u_{\text{eff}} p_{\text{est}}^{(1)}}}{2\lambda_2}. \end{aligned} \quad (\text{S1.8})$$

33 With  $\lambda_2 = \frac{1}{2} + \frac{s}{2}$  and  $\mu_2 = \frac{1}{2} - \frac{s}{2}$ , this yields:

$$p_{\text{est}}^{(2)} = 1 - \frac{1 + u_{\text{eff}} - \sqrt{(s - u_{\text{eff}})^2 + 2(1 + s)u_{\text{eff}}p_{\text{est}}^{(1)}}}{1 + s}. \quad (\text{S1.9})$$

34 **Establishment probability of an inhomogeneous single-type branching process** The  
 35 establishment probability of a single allele with time-dependent birth rate  $\lambda(t)$ , death rate  $\mu(t)$ ,  
 36 and growth parameter  $\lambda(t) - \mu(t) = s_{\text{eff}}(t)$  that arises at time  $T$  in a population is given by  
 37 (KENDALL, 1948; UECKER and HERMISSON, 2011)

$$p_{\text{est}}(T) = \frac{2}{1 + \int_T^{\infty} (\lambda(t) + \mu(t)) e^{-\int_T^t s_{\text{eff}}(\tau) d\tau} dt}. \quad (\text{S1.10})$$

38 **The extinction time of a single-type branching process** Consider a subcritical branch-  
 39 ing process with an initial number of  $n_0$  individuals. Individuals reproduce at rate  $\lambda$  and die at  
 40 rate  $\mu$ . From the probability that the process has gone extinct by time  $t$ ,  $P_0(n_0, t)$ , (see UECKER  
 41 and HERMISSON, 2011), we immediately obtain the distribution of the extinction time  $T_{\text{ext}}$ :

$$P(T_{\text{ext}} \leq t) = P_0(n_0, t) = \left( \frac{\mu(1 - e^{-(\lambda-\mu)t})}{\lambda - \mu + \mu(1 - e^{-(\lambda-\mu)t})} \right)^{n_0}. \quad (\text{S1.11})$$

42 We denote by

$$p^{(\text{ext})}(t) = \frac{d}{dt} P(T_{\text{ext}} \leq t) \quad (\text{S1.12})$$

43 the corresponding probability density.

## 44 **S1.2 Essential building blocks**

45 In order to match the results from the continuous-time approximation to the discrete time  
46 model, we need to make sure that the growth behavior and the amount of drift are the same  
47 (UECKER *et al.*, 2014). First, in order to guarantee that the long-term growth behavior is the  
48 same, we replace the growth parameter  $\sigma$  from the discrete-time model by  $\ln(1 + \sigma)$  in the  
49 continuous-time approximation whenever long-term growth is essential. In order to generate  
50 the same amount of drift, birth and death rates of individuals must sum up to 1 (at least in the  
51 diffusion limit). In a model with selection, this can be achieved in various ways, by distributing  
52 the effect of the effective growth parameter  $\sigma$  (or  $\ln(1 + \sigma)$ ) on the birth and death rates. If  
53 not stated otherwise, we usually do this symmetrically, i.e.,  $\lambda = \frac{1}{2} + \frac{\sigma}{2}$  and its death rate as  
54  $\mu = \frac{1}{2} - \frac{\sigma}{2}$ . This is appropriate as long as selection is not too strong. For very large (positive  
55 or negative)  $\sigma$ , one of the rates can turn negative. In that case, we switch to a different  
56 parameterization (and explicitly state this).

57 Throughout the analysis, we ignore back mutation. We furthermore assume that the mutation  
58 rate is small enough that we can neglect direct generation of the double mutant from the  
59 wildtype.

60 **The number of single mutants in the standing genetic variation** We assume that  
61 mutants are rare in relative frequency in the population, i.e., they only interact with wildtype  
62 individuals. This has several implications: (1) birth and death rates are constant (since mean  
63 fitness is  $\approx 1$ ), (2) a constant influx of new mutations (since  $n_{ab} \approx N_0$ ), (3) recombination  
64 has no effect on single mutants (since mutants only recombine with wildtype individuals), (4)  
65 interactions with double mutants can be ignored.

66 Then, from Eq. (S1.4) with  $m = uN_0(1 + \sigma_{Ab})$  and  $\lambda = \frac{1}{2} + \frac{\sigma_{Ab}}{2}$  and  $\mu = \frac{1}{2} - \frac{\sigma_{Ab}}{2}$ , we obtain the  
67 probability generating function  $F_{Ab}$  for the number of  $Ab$  mutants in the population; analogous,  
68 we obtain  $F_{aB}$ :

$$F_{Ab}(y) = \left( \frac{2\sigma_{Ab}}{y + y\sigma_{Ab} + \sigma_{Ab} - 1} \right)^{2uN_0}, \quad (\text{S1.13a})$$

$$F_{aB}(y) = \left( \frac{2\sigma_{aB}}{y + y\sigma_{aB} + \sigma_{aB} - 1} \right)^{2uN_0}. \quad (\text{S1.13b})$$

70 The mean number of  $Ab$  and  $aB$  mutants is given by

$$\bar{n}_{Ab} = \langle n_{Ab} \rangle = F'_{Ab}(1) = -\frac{uN_0}{\sigma_{Ab}}(1 + \sigma_{Ab}), \quad (\text{S1.14a})$$

$$\bar{n}_{aB} = \langle n_{aB} \rangle = F'_{aB}(1) = -\frac{uN_0}{\sigma_{aB}}(1 + \sigma_{aB}). \quad (\text{S1.14b})$$

72 **The number of double mutants in the standing genetic variation** In a large pop-  
73 ulation, in which single mutants are frequent in absolute but rare in relative numbers, their  
74 number can be well approximated by their mean value as given by Eq. (S1.14).

75 However, the number of double mutants is subject to strong stochasticity. Before the time  
76 of environmental change, their distribution can be modeled by a subcritical branching process  
77 with immigration. Immigration happens at rate

$$m_{AB} = \left( r \frac{\bar{n}_{Ab} \bar{n}_{aB}}{N_0} \right) (1 + \sigma_{AB}) + u(\bar{n}_{Ab} + \bar{n}_{aB})(1 + \sigma_{AB})(1 - r). \quad (\text{S1.15})$$

78 As the effective selection coefficient of  $AB$  individuals, we use

$$\sigma_{AB}^{\text{eff}} = (1 + \sigma_{AB})(1 - r) - 1. \quad (\text{S1.16})$$

79 Individuals of type  $AB$  reproduce at rate  $\frac{1}{2} + \frac{1}{2}\sigma_{AB}^{\text{eff}}$  and die at rate  $\frac{1}{2} - \frac{1}{2}\sigma_{AB}^{\text{eff}}$ .

80 With Eq. (S1.4), we obtain the probability generating function  $F_{AB}(s)$  for the number of double  
81 mutants in the standing genetic variation:

$$F_{AB}(y) = \left( \frac{2\sigma_{AB}^{\text{eff}}}{y + y\sigma_{AB}^{\text{eff}} + \sigma_{AB}^{\text{eff}} - 1} \right)^{\frac{2m_{AB}}{1+\sigma_{AB}^{\text{eff}}}}. \quad (\text{S1.17})$$

82 The mean number of double mutants is given by

$$\begin{aligned}
\langle n_{AB} \rangle &= F'_{AB}(1) = -\frac{m_{AB}}{\sigma_{AB}^{\text{eff}}} \\
&= -\frac{u^2 N_0}{\sigma_{Ab}\sigma_{aB}}(1 + \sigma_{AB}) \frac{r(1 + \sigma_{Ab} + \sigma_{aB} + \sigma_{Ab}\sigma_{aB}) - (1 - r)(\sigma_{Ab} + \sigma_{aB} + 2\sigma_{Ab}\sigma_{aB})}{\sigma_{AB} - r(1 + \sigma_{AB})} \\
&= -\frac{u^2 N_0}{\sigma^2}(1 + \sigma_{AB})(1 + \sigma) \frac{r(1 + \sigma) - 2\sigma(1 - r)}{\sigma_{AB} - r(1 + \sigma_{AB})},
\end{aligned}
\tag{S1.18}$$

83 where the last line holds for  $\sigma_{Ab} = \sigma_{aB} = \sigma$ .

84 With  $\sigma_{AB} = E_1 + (\sigma_{Ab} + \sigma_{aB} + \sigma_{Ab}\sigma_{aB}) = E_1 + \sigma(2 + \sigma)$  and  $|\sigma_{Ab}|$ ,  $|\sigma_{aB}|$ , and  $|\sigma_{AB}|$  small, we  
85 can further approximate:

$$\begin{aligned}
\langle n_{AB} \rangle &\approx \frac{u^2 N_0}{\sigma_{Ab}\sigma_{aB}} \frac{r - (\sigma_{Ab} + \sigma_{aB})}{r - E_1 - (\sigma_{Ab} + \sigma_{aB})} \\
&= \frac{u^2 N_0}{\sigma^2} \frac{r - 2\sigma}{r - E_1 - 2\sigma}.
\end{aligned}
\tag{S1.19}$$

86 We see that for  $E_1 = 0$  (no epistasis),  $\langle n_{AB} \rangle$  is independent of  $r$ ; for  $E_1 < 0$  (negative epistasis),  
87  $\langle n_{AB} \rangle$  increases with  $r$ ; for  $E_1 > 0$  (positive epistasis),  $\langle n_{AB} \rangle$  decreases with  $r$ . For  $r = 0$ , the  
88 mean number of double mutants is given by  $\frac{u^2 N_0}{\sigma^2} \frac{2\sigma}{E_1 + 2\sigma}$ , hence strongly dependent on the degree  
89 of epistasis. For  $r \gg |\sigma_{Ab} + \sigma_{aB}|$  and  $r \gg |\sigma_{AB}|$ , it converges to  $\frac{u^2 N_0}{\sigma_{Ab}\sigma_{aB}}$ , independently of  
90 epistasis.

91 **Establishment probabilities in the absence of the wildtype** In the absence of the  
92 wildtype, the double mutant is (effectively) not broken up by recombination. With Eq. (S1.6)



93 and  $\lambda_1 = \frac{1}{2} + \frac{1}{2} \ln(1 + s_{AB})$  and  $\mu_1 = \frac{1}{2} - \frac{1}{2} \ln(1 + s_{AB})$  (assuming  $\ln(1 + s_{AB}) \leq 1$ , which is  
 94 always the case in our examples), we obtain for the survival probability of a process which is  
 95 founded by a single individual of type  $AB$ :

$$p_{\text{est}}^{(AB)} = \frac{2 \ln(1 + s_{AB})}{1 + \ln(1 + s_{AB})} \approx 2s_{AB}, \quad (\text{S1.20})$$

96 where the approximation holds for  $s_{AB}$  small.

97 We also derive an approximation for the survival probability of a process founded by one  
 98 individual of type  $Ab$  (or  $aB$ ), when type  $AB$  can only be generated by mutation (either  
 99 because  $r = 0$  or because the other single mutant type is absent). The problem can then be  
 100 assessed by means of a two-type branching process. Type  $Ab$  has birth rate  $\frac{1}{2} + \frac{\hat{s}_{Ab}}{2}$  and death  
 101 rate  $\frac{1}{2} - \frac{\hat{s}_{Ab}}{2}$  with  $\hat{s}_{Ab} = \ln(1 + s_{Ab})$  (assuming  $-1 \leq \ln(1 + s_{Ab}) \leq 1$ , which is again always  
 102 fulfilled in our examples). It turns into type  $AB$  at rate  $u(1 + s_{AB})$  (analogously for type  $aB$ ).  
 103 With (S1.9) and  $Q_1 = 1 - p_{\text{est}}^{(AB)}$ , we obtain the establishment probability:

$$\begin{aligned} p_{\text{est}}^{(Ab)} &= 1 - \frac{1 + u(1 + s_{AB}) - \sqrt{(\hat{s}_{Ab} - u(1 + s_{AB}))^2 + 2u(1 + s_{AB})(1 + \hat{s}_{Ab})p_{\text{est}}^{(AB)}}}{1 + \hat{s}_{Ab}} \\ &\approx 1 - \frac{1 + u - \sqrt{(s_{Ab} - u)^2 + 4us_{AB}(1 + s_{Ab})}}{1 + s_{Ab}} \\ &\approx 1 - (1 + u - s_{Ab} - \sqrt{(s_{Ab} - u)^2 + 4us_{AB}}) \\ &= s_{Ab} - u + \sqrt{(s_{Ab} - u)^2 + 4us_{AB}} \\ &\approx \frac{2us_{AB}}{-s_{Ab}}. \end{aligned} \quad (\text{S1.21})$$

104 The last approximation holds for  $s_{Ab} < 0$  and  $s_{Ab}^2 \gg us_{AB}$ . It can be easily interpreted:  
 105  $\frac{1}{-s_{Ab}}$  is the mean number of descendants of a single  $Ab$  individual. Each of these descendants  
 106 mutates with probability  $u$ , leading to a permanently establishing lineage of  $AB$  individuals  
 107 with probability  $2s_{AB}$ .

108 **Establishment probabilities in the presence of the wildtype** If the wildtype dominates  
 109 over the single mutants at all times, the double mutant virtually always recombines with the  
 110 wildtype (until it becomes frequent and rescue has occurred). Under these conditions, the  
 111 effective growth parameter of the rescue type can be approximated as

$$s_{\text{eff}}(t) = \begin{cases} (1 + s_{AB})(1 - r) - 1 & \text{as long as the wildtype exists,} \\ s_{AB} & \text{as soon as the wildtype has died out.} \end{cases} \quad (\text{S1.22})$$

112 If the wildtype decays very slowly and if we can furthermore assume that no double mutants  
 113 get generated once the wildtype has gone extinct, this yields for the establishment probability  
 114 of the double mutant:

$$p_{\text{est}}^{(AB)} = \begin{cases} \frac{2 \ln [(1+s_{AB})(1-r)]}{1 + \ln [(1+s_{AB})(1-r)]} & \text{if } \ln [(1 + s_{AB})(1 - r)] > 0, \\ 0 & \text{else.} \end{cases} \quad (\text{S1.23})$$

$$\approx \max [2(s_{AB} - r), 0].$$

115 Following the same derivation as in Eq. (S1.21), the probability that a single  $Ab$  individual will  
 116 eventually give rise to a successful lineage of  $AB$  individuals is

$$\begin{aligned}
 p_{\text{est}}^{(Ab)} &= 1 - \frac{1 + u(1 + s_{AB})(1 - r) - \sqrt{(\hat{s}_{Ab} - u(1 + s_{AB})(1 - r))^2 + 2u(1 + s_{AB})(1 - r)(1 + \hat{s}_{Ab})} p_{\text{est}}^{(AB)}}{1 + \hat{s}_{Ab}} \\
 &\approx s_{Ab} - u(1 - r) + \sqrt{(s_{Ab} - u(1 - r))^2 + 4u(1 - r) \max[2(s_{AB} - r), 0]} \\
 &\approx \frac{2u(1 - r) \max[2(s_{AB} - r), 0]}{-s_{Ab}}.
 \end{aligned}
 \tag{S1.24}$$

117 The simple approximation  $p_{\text{est}}^{(AB)}$ , Eq. (S1.23), fails when the wildtype population size decays  
 118 quickly. In case of a fast (but not instantaneous) eradication of the wildtype, we need to apply to  
 119 a more refined approximation for the establishment probability of type  $AB$ . The extinction time  
 120 of the wildtype is a stochastic variable. If we ignore mutation and recombination, the dynamics  
 121 of the wildtype is given by a subcritical branching process with initial size  $n_{ab}(0) \approx N_0$ , and  
 122 we can calculate the distribution of the extinction time  $T_{\text{ext}}$  with the help of Eq. (S1.11). Since  
 123  $\ln(1 + s_{ab})$  is considerably smaller than  $-1$  if  $s_{ab}$  is strongly negative, we deviate from our  
 124 default approximation for  $\lambda$  and  $\mu$  here and choose  $\lambda = 1/2$  and  $\mu = 1/2 - \ln(1 + s_{ab})$  to keep  
 125 selection at the right level and avoid negative birth rates. With this, we obtain

$$P(T_{\text{ext}} \leq t) = \left( \frac{1 - e^{-s_{ab}t}}{\frac{2s_{ab}}{1-s_{ab}} + 1 - e^{-s_{ab}t}} \right)^{N_0}
 \tag{S1.25}$$

126 and from this the probability density  $p^{(\text{ext})}(T_{\text{ext}})$ .

127 For a given  $T_{\text{ext}}$ , we can calculate the establishment probability of a single double mutant based  
 128 on a time-inhomogeneous branching process with death rate  $\frac{1}{2} - \frac{\hat{s}_{\text{eff}}(t)}{2}$  and birth rate  $\frac{1}{2} + \frac{\hat{s}_{\text{eff}}(t)}{2}$   
 129 with  $\hat{s}_{\text{eff}}(t)$  defined by

$$\hat{s}_{\text{eff}}(t) = \begin{cases} \ln((1 + s_{AB})(1 - r)) & t \leq T_{\text{ext}}, \\ \ln(1 + s_{AB}) & t > T_{\text{ext}} \end{cases} \quad (\text{S1.26})$$

130 (see Eq. (S1.10)). This gives for  $t < T_{\text{ext}}$ :

$$p_{\text{est}}^{(AB)}(t|T_{\text{ext}}) = \frac{2}{1 + I(t, T_{\text{ext}})} \quad (\text{S1.27})$$

131 with

$$\begin{aligned} I(t, T_{\text{ext}}) &= \int_t^{\infty} e^{-\int_t^T \hat{s}_{\text{eff}}(\tau) d\tau} dT \\ &= \frac{1}{s_1} - \left( \frac{1}{s_1} - \frac{1}{s_2} \right) e^{-s_1(T_{\text{ext}} - t)}, \end{aligned} \quad (\text{S1.28})$$

132 where  $s_1$  and  $s_2$  are given by  $\hat{s}_{\text{eff}}$  before and after extinction of the wildtype respectively. For  
 133  $t \geq T_{\text{ext}}$ , the establishment probability is given by Eq. (S1.20).

134 Over all possible extinction times, we get

$$p_{\text{est}}^{(AB)}(t) = \int_t^{\infty} p(T_{\text{ext}}) \frac{2}{1 + I(t, T_{\text{ext}})} dT_{\text{ext}} + \int_0^t p(T_{\text{ext}}) \frac{2 \ln(1 + s_{AB})}{1 + \ln(1 + s_{AB})} dT_{\text{ext}}. \quad (\text{S1.29})$$

135 The numerical evaluation of integrals is done in Mathematica (Wolfram Research, Champaign,  
136 USA).

## 137 **S2 No recombination**

138 For complete linkage, approximations have been derived in IWASA *et al.* (2003, 2004). These  
139 approximations model all allele frequencies in the standing genetic variation deterministically.  
140 We extend these results by a stochastic treatment of the number of double mutants standing  
141 genetic variation.

142 **The distribution of standing genetic variation** In principle, the number of single and  
143 double mutants in the population can be modeled as a two-type branching process with immi-  
144 gration. However, analytical solutions for the p.g.f. are not easily derived. We therefore propose  
145 two simpler approximations to estimate the contribution of the standing genetic variation for  
146 rescue. (1) If the population size is small, double mutants in the standing genetic variation can  
147 often be neglected; the number of single mutants is subject to stochasticity. The probability  
148 generating functions  $F_{Ab}$  and  $F_{aB}$  are given by Eq. (S1.13). (2) If the population size is large,  
149 the number of single mutant types is well approximated by their expected value (Eq. (S1.14)).  
150 The probability generating function for the number of double mutants  $F_{AB}$  is then given by  
151 Eq. (S1.17).

152 **Establishment probability of the rescue mutant** After the change in the environment,  
153 a lineage initiated by one individual of type  $AB$  survives with probability  $p_{\text{est}}^{(AB)}$  as given by  
154 Eq. (S1.20) A lineage that is founded by a single individual of type  $Ab$  (or  $aB$ ) survives with  
155 probability  $p_{\text{est}}^{(Ab)}$  as given by Eq. (S1.21). These results do not depend on the dynamics of  
156 the wildtype when  $r = 0$  because of our assumption of a hard carrying capacity (no density  
157 dependence until  $N \geq N_0$ ).

158 **The probability of evolutionary rescue** We first consider the case that the number of  
159 double mutants before the change in the environment can be ignored. Rescue can now ei-  
160 ther pass via single mutants from the standing genetic variation or via newly generated single  
161 mutants. The number of successful offspring of a single type  $Ab$  individual is Poisson dis-  
162 tributed with parameter  $(1 + s_{Ab})p_{\text{est}}^{(Ab)}$ . If  $n_{Ab}$  individuals of type  $Ab$  are present at the time  
163 of environmental change, they hence do not establish a permanent lineage with probability  
164  $\exp[-n_{Ab}(1 + s_{Ab})p_{\text{est}}^{(Ab)}]$ . It remains to average over the distribution of  $n_{Ab}$ , for which one  
165 can conveniently use the p.g.f.  $F_{Ab}$ , Eq. (S1.13) (analogous for type  $aB$ ). In order to de-  
166 termine the number of single mutants that get generated after the environmental change, we  
167 assume that the decay of the wildtype population size can be well described deterministically  
168 by  $n_{ab}(t) \approx N_0(1 + s_{ab})^t$  (cf. ORR and UNCKLESS, 2008; UECKER *et al.*, 2014). The number of  
169 de-novo generated single mutants is then given by  $\sum_{t=0}^{\infty} un_{ab}(t)(1 + s_{Ab}) \approx \frac{uN_0}{-s_{ab}}(1 + s_{Ab})$ . With

170 this, we obtain:

$$P_{\text{rescue}} = 1 - F_{Ab}(e^{-(1+s_{Ab})p_{\text{est}}^{(Ab)}})F_{aB}(e^{-(1+s_{aB})p_{\text{est}}^{(aB)}})e^{-\frac{uN_0}{-s_{ab}}(1+s_{Ab})p_{\text{est}}^{(Ab)} - \frac{uN_0}{-s_{ab}}(1+s_{aB})p_{\text{est}}^{(aB)}}. \quad (\text{S2.1})$$

171 If single mutants are frequent and we describe double mutants stochastically, using the expected  
172 values  $\bar{n}_{Ab}$  and  $\bar{n}_{aB}$ , we have:

$$P_{\text{rescue}} = 1 - F_{AB}(e^{-(1+s_{AB})p_{\text{est}}^{(AB)}})e^{-u(\bar{n}_{Ab} + \bar{n}_{aB})(1+s_{AB})p_{\text{est}}^{(AB)}}e^{-\bar{n}_{Ab}(1+s_{Ab})p_{\text{est}}^{(Ab)} - \bar{n}_{aB}(1+s_{aB})p_{\text{est}}^{(aB)}} \\ \times e^{-\frac{uN_0}{-s_{ab}}(1+s_{Ab})p_{\text{est}}^{(Ab)} - \frac{uN_0}{-s_{ab}}(1+s_{aB})p_{\text{est}}^{(aB)}}. \quad (\text{S2.2})$$

173 If we can treat the number of double mutants deterministically, we obtain:

$$P_{\text{rescue}} = 1 - e^{-(1+s_{AB})\bar{n}_{AB}p_{\text{est}}^{(AB)}}e^{-u(\bar{n}_{Ab} + \bar{n}_{aB})(1+s_{AB})p_{\text{est}}^{(AB)}}e^{-\bar{n}_{Ab}(1+s_{Ab})p_{\text{est}}^{(Ab)} - \bar{n}_{aB}(1+s_{aB})p_{\text{est}}^{(aB)}} \\ \times e^{-\frac{uN_0}{-s_{ab}}(1+s_{Ab})p_{\text{est}}^{(Ab)} - \frac{uN_0}{-s_{ab}}(1+s_{aB})p_{\text{est}}^{(aB)}}. \quad (\text{S2.3})$$

174 with

$$\bar{n}_{AB} = \frac{u(\bar{n}_{Ab} + \bar{n}_{aB})}{-\sigma_{AB}}(1 + \sigma_{AB}). \quad (\text{S2.4})$$

175 **Comparison to IWASA *et al.* (2003, 2004)** We can compare our approximations to the  
176 approximation derived in IWASA *et al.* (2003, p. 2574) and IWASA *et al.* (2004, Eq. (9)), who  
177 describe all allele frequencies prior to the environmental change deterministically (derived as  
178 the stationary solution of a system of differential equations). Consequently, as can be seen from  
179 Fig. S2.1, the approximation is in good agreement with Eq. (S2.3) (up to minor deviations due

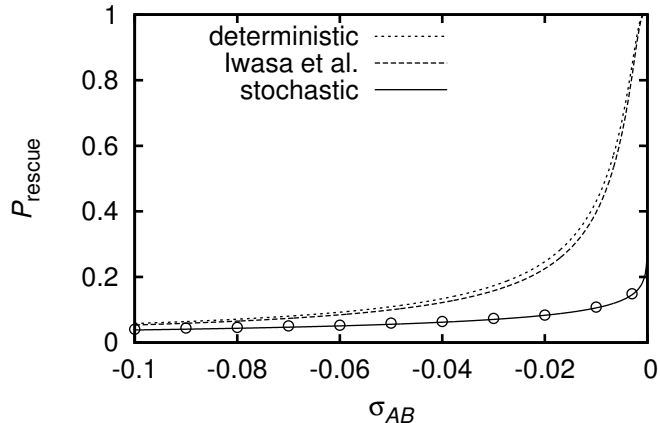

**Fig. S2.1: Probability of evolutionary rescue as a function of  $\sigma_{AB}$ .** The theoretical predictions are based on Eq. (S2.2) (solid line), Iwasa *et al.* (2003, 2004) (long-dashed line), and Eq. (S2.3) (short-dashed line). Parameter values:  $\sigma_{Ab} = \sigma_{aB} = -0.01$ ,  $s_{Ab} = s_{aB} = s_{ab} = -0.5$ ,  $s_{AB} = 0.15$ ,  $u = 10^{-5}$ ,  $N_0 = 10^6$ . Symbols denote simulation results. Each simulation point is the average of  $10^5$  replicates.

180 to details in the model and the analysis). Both strongly overestimate the real rescue probability  
 181 in Fig. S2.1. The reason is that the number of double mutants in the standing genetic variation  
 182 – from which rescue mainly occurs in the parameter regime shown in the figure – is subject  
 183 to strong fluctuations. This matters mainly for weakly deleterious double mutants: Then, the  
 184 average number of double mutants is high enough to provide a population with a decent chance  
 185 to survive, and the deterministic approximation assumes that each replicate population contains  
 186 this average number of double mutants. Stochastically, however, some replicate populations  
 187 have a very high chance to survive (but a single population can only get rescued once; the very  
 188 high number of double mutants is hence redundant), while most of them contain no double  
 189 mutants at all and go extinct.



## 190 **S3 The role of recombination**

191 From now on, we assume that the population is large enough that we can approximate the  
192 number of  $Ab$  and  $aB$  mutants in the standing genetic variation by their expected number,  
193 Eq. (S1.14). For the number of double mutants prior to the environmental change, we use  
194  $F_{AB}$ , Eq. (S1.17). In order to keep the equations simple, we usually assume  $\sigma_{Ab} = \sigma_{aB} = \sigma$ .  
195 Generalization to unequal selection coefficients for single mutants before the environmental  
196 change is straightforward.

### 197 **S3.1 Single mutants are lethal in the new environment**

198 **The wildtype is lethal too** In the absence of any other types, a single rescue type in-  
199 dividual establishes a permanent lineage with probability  $p_{\text{est}}^{(AB)}$ , Eq. (S1.20). In the first  
200 generation after the switch, with our choice of the life cycle (mutation and recombination  
201 before selection), the wildtype and the single mutants are, however, still present in the pop-  
202 ulation (leading to the generation and deletion of  $AB$  mutants). A single rescue type in-  
203 dividual present at the time of environmental change will hence not establish a permanent  
204 lineage with probability  $\exp[-p_{\text{est}}^{(AB)}(1 + s_{AB})(1 - r)]$ , and the probability that no new suc-  
205 cessful lineage is generated by recombination or mutation in this first generation is given by  
206  $\exp\left[-\left(r\frac{\bar{n}_{Ab}\bar{n}_{aB}}{N}(1 + s_{AB}) + u(\bar{n}_{Ab} + \bar{n}_{aB})(1 + s_{AB})(1 - r)\right)p_{\text{est}}^{(AB)}\right]$ . With this, the probability

207 of evolutionary rescue is given by

$$P_{\text{rescue}} = 1 - F_{AB}(e^{-(1+s_{AB})(1-r)p_{\text{est}}^{(AB)}}) \times e^{-\left(r\frac{\bar{n}_{Ab}\bar{n}_{aB}}{N_0}(1+s_{AB})+u(\bar{n}_{Ab}+\bar{n}_{aB})(1+s_{AB})(1-r)\right)p_{\text{est}}^{(AB)}}. \quad (\text{S3.1})$$

208 With  $p_{\text{est}}^{(AB)} \approx 2s_{AB}$  and  $\sigma_{Ab} = \sigma_{aB} = \sigma$ , we can approximate

$$\begin{aligned} F(e^{-(1+s_{AB})(1-r)p_{\text{est}}^{(AB)}}) &\approx F(1 - 2s_{AB}(1-r)) \\ &= \left(1 + \frac{2s_{AB}(1 + \sigma_{AB})(1-r)^2}{2(1-r)(1 + \sigma_{AB}) - 2s_{AB}(1-r)^2(1 + \sigma_{AB}) - 2}\right)^{\frac{2(1+\sigma_{AB})\left[r\frac{u^2N_0}{\sigma^2}(1+\sigma)^2 + \frac{u^2N_0}{-\sigma}(1+\sigma)(1-r)\right]}{(1+\sigma_{AB})(1-r)}} \\ &= \left(1 + \frac{s_{AB}(1-r)^2}{-s_{AB}(1-r)^2 + (1-r)\sigma_{AB} - 1}\right)^{-\frac{2u^2N_0}{\sigma^2}\left[2\sigma - \frac{r}{1-r}\right]} \\ &\approx \left(\frac{r - (2\sigma + E_1)(1-r)}{s_{AB}(1-r)^2 + r - (2\sigma + E_1)(1-r)}\right)^{-\frac{2u^2N_0}{\sigma^2}\left[2\sigma - \frac{r}{1-r}\right]} \\ &\approx \left(\frac{r - 2\sigma - E_1}{s_{AB}(1-r)^2 + r - 2\sigma - E_1}\right)^{-\frac{2u^2N_0}{\sigma^2}\left[2\sigma - \frac{r}{1-r}\right]}, \end{aligned} \quad (\text{S3.2})$$

209 where the first approximation is a series expansion of the exponential function up to first order  
 210 in the exponent and the second approximation is based on dropping higher order terms in  $\sigma_{AB}$   
 211 and  $\sigma$  in the numerator, the denominator, and the exponent. The approximation in the last  
 212 line consists in approximating  $r - (1-r)(2\sigma + E_1) \approx r - 2\sigma - E_1$  since the second term only  
 213 matters when  $r$  is small, i.e. when  $1-r \approx 1$ . If we furthermore ignore new mutations after the

214 switch in the environment, we obtain:

$$P_{\text{rescue}} \approx 1 - \left( \frac{r - 2\sigma - E_1}{s_{AB}(1-r)^2 + r - 2\sigma - E_1} \right)^{-\frac{2u^2 N_0}{\sigma^2} \left[ 2\sigma - \frac{r}{1-r} \right]} e^{-2s_{AB}r \frac{u^2 N_0}{\sigma^2}}. \quad (\text{S3.3})$$

215 If we do not take stochasticity in the number of double mutants in the standing genetic variation  
 216 into account, we get

$$\begin{aligned} P_{\text{rescue}}^{\text{det}} &= 1 - e^{-\langle n_{AB} \rangle (1+s_{AB})(1-r) p_{\text{est}}^{(AB)}} \times e^{-\left( r \frac{\bar{n}_{Ab} \bar{n}_{aB}}{N} (1+s_{AB}) + u(\bar{n}_{Ab} + \bar{n}_{aB})(1+s_{AB})(1-r) \right) p_{\text{est}}^{(AB)}} \\ &\approx 1 - e^{-2 \frac{u^2 N_0}{\sigma^2} s_{AB} \left[ 1 - \frac{(1-r)(2-2\sigma-E_1)}{r-2\sigma-E_1} \right]} \\ &\approx 1 - e^{-2s_{AB} \frac{u^2 N_0}{\sigma^2} \frac{r-2\sigma}{r-2\sigma-E_1}}, \end{aligned} \quad (\text{S3.4})$$

217 where the first approximation makes use of the approximation for  $\langle n_{AB} \rangle$  (Eq. S1.19) and fur-  
 218 thermore uses  $p_{\text{est}}^{(AB)} \approx 2s_{AB}$  and  $1 + s_{AB} \approx 1$  and ignores new mutations from generation 0 to  
 219 1.

220 With this, we can compare the probability of evolutionary rescue (1) without epistasis and  
 221 without drift (Eq. S3.4 with  $E_1 = 0$ ), (2) without epistasis but with drift (Eq. S3.1 with  
 222  $E_1 = 0$ ), (3) with epistasis but without drift (Eq. S3.4 with  $E_1 \neq 0$ ), and (4) with epistasis and  
 223 with drift (Eq. S3.1 with  $E_1 \neq 0$ ). Fig. S3.1 shows all four cases. Note that the establishment  
 224 of the rescue type after the environmental change is in any case subject to strong stochasticity.

225 Last, we want to estimate the influence of drift on the rescue probability

$$d = \frac{P_{\text{rescue}} - P_{\text{rescue}}^{\text{det}}}{P_{\text{rescue}}^{\text{det}}}. \quad (\text{S3.5})$$

226 For this, we approximate by a Taylor expansion up to leading order in  $s_{AB}$  (and similar ap-  
227 proximations as in Eq. S3.4):

$$\begin{aligned} P_{\text{rescue}} - P_{\text{rescue}}^{\text{det}} &\approx \left( e^{-2s_{AB}\langle n_{AB} \rangle(1-r)} - \langle e^{-2s_{AB}n_{AB}(1-r)} \rangle \right) e^{-2s_{AB}r \frac{\bar{n}_{Ab}\bar{n}_{aB}}{N_0}} \\ &\approx -2s_{AB}^2(1-r)^2 \text{Var}[n_{AB}] + \mathcal{O}(s_{AB}^3). \end{aligned} \quad (\text{S3.6})$$

228 This leaves us with

$$\begin{aligned} d &\approx -\frac{s_{AB}(1-r)^2 \text{Var}[n_{AB}]}{(1-r)\langle n_{AB} \rangle + r \frac{\bar{n}_{Ab}\bar{n}_{aB}}{N_0}} + \mathcal{O}(s_{AB}^2) \\ &= -\frac{-s_{AB}(1-r)^2 \frac{\text{Var}[n_{AB}]}{\langle n_{AB} \rangle}}{(1-r) + r \frac{\bar{n}_{Ab}\bar{n}_{aB}}{N_0 \langle n_{AB} \rangle}} + \mathcal{O}(s_{AB}^2) \\ &\approx \frac{\text{Var}[n_{AB}]}{\langle n_{AB} \rangle} \cdot \frac{-s_{AB}(1-r)^2}{1 + r \frac{E_1}{r-2\sigma}} + \mathcal{O}(s_{AB}^2). \end{aligned} \quad (\text{S3.7})$$

229 For the last line, we used Eq. (S1.19) and  $n_{Ab} = n_{aB} \approx -\frac{uN_0}{\sigma}$ . For the ratio of variance to  
230 mean, we obtain:

$$\begin{aligned} \frac{\text{Var}[n_{AB}]}{\langle n_{AB} \rangle} &= \frac{F''_{AB}(1) + F'_{AB}(1) - F'_{AB}(1)^2}{F'_{AB}(1)} \\ &= \frac{1}{2} \left( 1 + \frac{1}{r(1 + \sigma_{AB}) - \sigma_{AB}} \right), \end{aligned} \quad (\text{S3.8})$$

231 which is a decreasing function of  $r$ , i.e., the relative importance of drift decreases with  $r$ . Note  
 232 that the variance itself depends on epistasis and is not decreasing over the entire parameter  
 233 range (it can be increasing, decreasing, or be non-monotonic).

234 For  $|\sigma|$  and  $|\sigma_{AB}|$  small, we can further approximate

$$d \approx -\frac{\text{Var}[n_{AB}]}{\langle n_{AB} \rangle} s_{AB} (1-r)^2 \approx -\frac{1}{2} (1-r)^2 (1+r) \frac{s_{AB}}{r - \sigma_{AB}}. \quad (\text{S3.9})$$

235 Although the approximation deviates from the exact result for small  $r$ , we can read off the  
 236 qualitative behavior:  $d$  is negative and monotonically increasing with  $r$ , i.e., the larger  $r$ , the  
 237 less drift reduces  $P_{\text{rescue}}$ . We can distinguish two regimes: (1) If  $|\sigma_{AB}| \gg s_{AB}$ , drift does not  
 238 play a significant role, irrespective of  $r$ . (2) If  $|\sigma_{AB}| \ll s_{AB}$ , drift has a significant influence  
 239 unless  $r \gg s_{AB}$ .

240 **The wildtype remains** If the wildtype population size decays slowly after the environmen-  
 241 tal change, the establishment probability of a single rescue mutant is well approximated by  
 242 Eq. (S1.23). Analogous to before, we then obtain

$$P_{\text{rescue}} = 1 - F_{AB} \left( e^{-(1+s_{AB})(1-r)} p_{\text{est}}^{(AB)} \right) \times e^{-\left( r \frac{\bar{n}_{Ab} \bar{n}_{aB}}{N_0} (1+s_{AB}) + u(\bar{n}_{Ab} + \bar{n}_{aB}) (1+s_{AB})(1-r) \right) p_{\text{est}}^{(AB)}}. \quad (\text{S3.10})$$

243 Actually,  $e^{-(1+s_{AB})(1-r)(1-q_{AB})} = q_{AB}$  (where  $q_{AB}$  is the exact extinction probability of a branch-  
 244 ing process with Poisson distributed offspring numbers with mean  $(1+s_{AB})(1-r)$ ), and so we

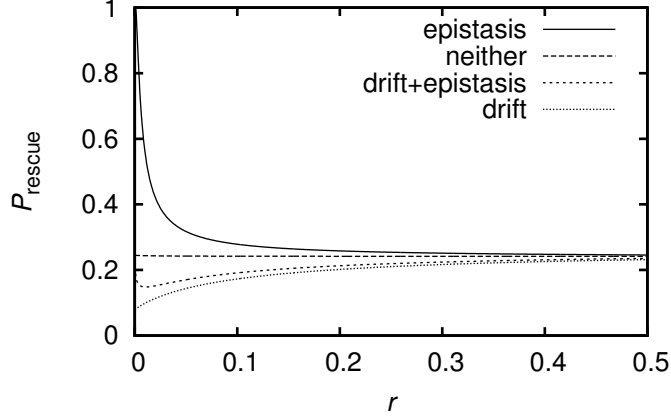

**Fig. S3.1: Probability of evolutionary rescue as a function of recombination (cf. Fig. 1).** The curves are based on Eq. (S3.1) (drift) and Eq. (S3.1) (no drift). Parameter values are:  $\sigma_{AB} = -0.0199$  (no epistasis) and  $\sigma_{AB} = -0.0001$  (epistasis),  $\sigma_{Ab} = \sigma_{aB} = -0.01$ ,  $u = 10^{-5}$ ,  $N_0 = 10^6$ ,  $s_{AB} = 0.15$ ,  $s_{Ab} = s_{aB} = s_{ab} = -1$ .

245 could simply use  $F_{AB}(1 - p_{\text{est}}^{(AB)})$ . Since we use an approximation for  $q_{AB}$  (which is our approx-  
 246 imation  $1 - p_{\text{est}}^{(AB)}$ ), we prefer the above form for consistency with the previous paragraph.

247 As before, we can derive an approximation, ignoring stochasticity in the number of double  
 248 mutants

$$\begin{aligned}
 P_{\text{rescue}}^{\text{det}} &= 1 - e^{-\langle n_{AB} \rangle (1+s_{AB})(1-r)} p_{\text{est}}^{(AB)} \times e^{-\left( r \frac{\bar{n}_{Ab} \bar{n}_{aB}}{N} (1+s_{AB}) + u (\bar{n}_{Ab} + \bar{n}_{aB}) (1+s_{AB})(1-r) \right)} p_{\text{est}}^{(AB)} \\
 &\approx \begin{cases} 1 - e^{-2 \frac{u^2 N_0}{\sigma^2} (s_{AB} - r) \left[ 1 - \frac{(2-2\sigma-E_1)(1-r)}{r-2\sigma-E_1} \right]} \approx 1 - e^{-2(s_{AB}-r) \frac{u^2 N_0}{\sigma^2} \frac{r-2\sigma}{r-2\sigma-E_1}} & \text{if } s_{AB} - r > 0, \\ 0 & \text{else,} \end{cases}
 \end{aligned}
 \tag{S3.11}$$

249 where we approximate  $p_{\text{est}}^{(AB)} \approx \max(2(s_{AB} - r), 0)$ .

250 **The wildtype is quite unfit** If the wildtype is not very fit, we need to resort to the more  
 251 accurate approximation Eq. (S1.29) for the establishment probability of the double mutant.  
 252 For the probability of rescue, we obtain as before:

$$P_{\text{rescue}} = 1 - F_{AB} \left( e^{-(1+s_{AB})(1-r)} p_{\text{est}}^{(AB)}(1) \right) \times e^{-\left( r \frac{\bar{n}_{Ab} \bar{n}_{aB}}{N_0} (1+s_{AB}) + u(n_{Ab} + n_{aB})(1+s_{AB})(1-r) \right) p_{\text{est}}^{(AB)}(1)} .$$

(S3.12)

253 **Sensitivity of the approximation** How sensitive are the approximations to the assumption  
 254 of lethality of the single mutants? Fig. S3.2 compares the approximations (assuming  $s_{Ab} =$   
 255  $s_{aB} = -1$ ) to simulations with  $s_{Ab} = s_{aB} = -0.99$  (Panel A) and  $s_{Ab} = s_{aB} = -0.9$  (Panel B).  
 256 The fitter the wildtype the less sensitive is the approximation to deviations from strict lethality  
 257 of the single mutants. For a lethal wildtype, even a slight increase in the fitness of mutants  
 258 above lethality drastically increases  $P_{\text{rescue}}$ .

## 259 S3.2 One single mutant is viable, the other lethal

260 Let us now consider the situation  $s_{Ab} > -1$  and  $s_{aB} = -1$  after the environmental change.

261 **The wildtype is lethal** The presence of one of the single mutant types after the environmen-  
 262 tal change opens up a new rescue pathway: new double mutants can be generated by mutation  
 263 after generation 0. Analogous to before, the probability that the population is rescued via this

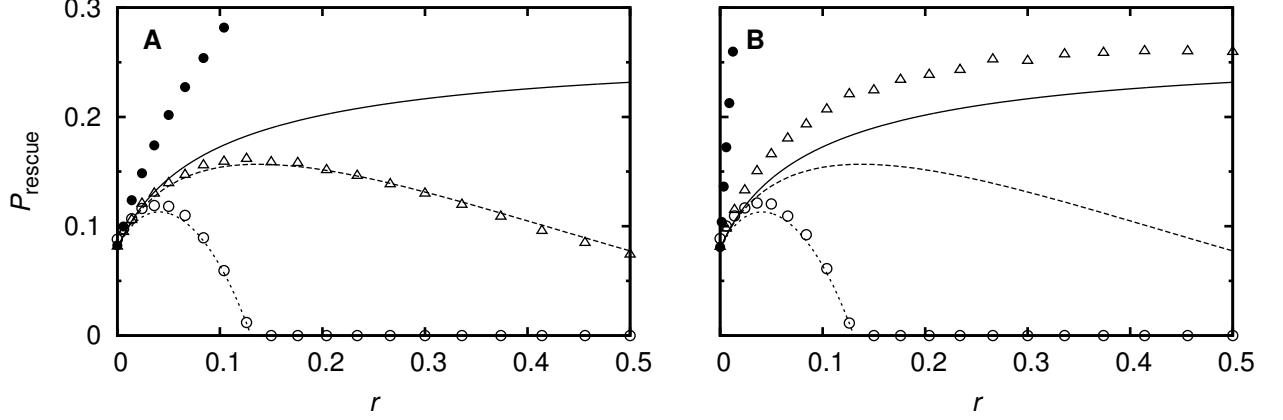

**Fig. S3.2: Probability of evolutionary rescue as a function of recombination.** The figure is identical to Fig. 1 except for that we set  $s_{Ab} = s_{aB} = -0.99$  (Panel A) and  $s_{Ab} = s_{aB} = -0.9$  (Panel B) in the simulations. The growth parameter of the wildtype is  $s_{ab} = -1$  (solid lines, filled circle),  $s_{ab} = -0.99$  (dashed line, triangles),  $s_{ab} = -0.005$  (dotted line, empty circles). Circles and triangles denote simulation results. Each simulation point is the average of  $10^5$  replicates.

264 pathway is given by

$$1 - e^{-(\bar{n}_{Ab} + uN_0)(1+s_{Ab})p_{\text{est}}^{(Ab)}} \quad (\text{S3.13})$$

265 with  $p_{\text{est}}^{(Ab)}$  given by Eq. (S1.21). Combination with Eq. (S3.1) yields the total probability of  
 266 evolutionary rescue:

$$P_{\text{rescue}} = 1 - F_{AB}(e^{-(1+s_{AB})(1-r)p_{\text{est}}^{(AB)}}) \times e^{-\left(r \frac{\bar{n}_{Ab}\bar{n}_{aB}}{N_0}(1+s_{AB}) + u(\bar{n}_{Ab} + \bar{n}_{aB})(1+s_{AB})(1-r)\right)p_{\text{est}}^{(AB)}} \quad (\text{S3.14})$$

$$\times e^{-(\bar{n}_{Ab} + uN_0)(1+s_{Ab})p_{\text{est}}^{(Ab)}}.$$

267 We can estimate the respective significance of the contributions by a comparison of Eq. (S3.13)  
 268 with Eq. (S3.4), assuming  $\sigma_{Ab} = \sigma_{aB}$ . Approximating  $\bar{n}_{Ab} \approx \frac{uN_0}{-\sigma_{Ab}}$  and  $1 + s_{Ab} \approx 1$  and ignoring  
 269 the term that accounts for new mutations ( $\sim uN_0$ ) in Eq. (S3.13) and setting  $E_1 = 0$  in



270 Eq. (S3.4), we arrive at the condition

$$p_{\text{est}}^{(Ab)} > 2 \frac{u s_{AB}}{-\sigma_{Ab}} \quad (\text{S3.15})$$

271 for the contribution of new rescue mutations after the environmental change being larger than  
 272 the contribution by double mutants from the standing genetic variation. With the last approx-  
 273 imation for  $p_{\text{est}}^{(Ab)}$  in Eq. (S1.21), this condition simplifies to

$$\frac{2u s_{Ab}}{-s_{Ab}} > \frac{2u s_{Ab}}{-\sigma_{Ab}} \Leftrightarrow -\sigma_{Ab} > -s_{Ab}. \quad (\text{S3.16})$$

274 If  $s_{Ab} > 0$ , rescue is not contingent on the generation of the double mutant. Depending on the  
 275 mutation rate and the fitness effects of mutations, generation of the double mutant might still  
 276 help rescue or be negligible. In the latter case, results from single step rescue apply (ORR and  
 277 UNCKLESS, 2008; BELL and COLLINS, 2008; UECKER *et al.*, 2014). Formation of the double  
 278 mutant after the environmental change cannot be ignored in Eq. (S3.13) if

$$\begin{aligned} 2s_{Ab} &\ll p_{\text{est}}^{(Ab)} \\ \Leftrightarrow 2s_{Ab} &\ll s_{Ab} - u + \sqrt{(s_{Ab} - u)^2 + 4s_{AB}u} \\ \Leftrightarrow s_{Ab} + u &\ll \sqrt{(s_{Ab} - u)^2 + 4s_{AB}u} \\ \stackrel{s_{Ab} \gg u}{\Leftrightarrow} s_{Ab} &\ll \sqrt{s_{Ab}^2 + 4s_{AB}u} = s_{Ab} \cdot \sqrt{1 + \frac{4s_{AB}u}{s_{Ab}^2}} \\ \Leftrightarrow 4s_{AB}u &\gg s_{Ab}^2. \end{aligned} \quad (\text{S3.17})$$

279 Altogether, generation of the double mutant cannot be ignored if

$$\begin{aligned}
2s_{Ab} \frac{uN_0}{-\sigma} &\ll p_{\text{est}}^{(Ab)} \frac{uN_0}{-\sigma} + 2s_{AB} \frac{u^2N_0}{\sigma^2} \frac{r-2\sigma}{r-2\sigma-E_1} \\
\Leftrightarrow 2s_{Ab} &\ll s_{Ab} - u + \sqrt{(s_{Ab} - u)^2 + 4s_{AB}u} + 2s_{AB} \frac{u^2N_0}{\sigma^2} \frac{r-2\sigma}{r-2\sigma-E_1} \\
\Leftrightarrow s_{Ab} + u &\ll \sqrt{(s_{Ab} - u)^2 + 4s_{AB}u} + 2s_{AB} \frac{u^2N_0}{\sigma^2} \frac{r-2\sigma}{r-2\sigma-E_1} \tag{S3.18} \\
\stackrel{s_{Ab} \gg u}{\Leftrightarrow} s_{Ab} &\ll s_{Ab} \cdot \sqrt{1 + \frac{4s_{AB}u}{s_{Ab}^2}} + 2s_{AB} \frac{u^2N_0}{\sigma^2} \frac{r-2\sigma}{r-2\sigma-E_1} \\
\Leftrightarrow 4s_{AB}u &\gg s_{Ab}^2 \quad \text{or} \quad 2s_{AB} \frac{u^2N_0}{\sigma^2} \frac{r-2\sigma}{r-2\sigma-E_1} \gg s_{Ab}.
\end{aligned}$$

280 **The wildtype is at least as fit as the viable single mutant** Viability of the wildtype  
281 has two consequences: (1) The double mutant can be broken up by recombination. (2) The  
282 wildtype can generate new *Ab* mutants on its course to extinction. Modeling the wildtype  
283 deterministically, we obtain for the probability of rescue by de-novo generated double mutants

$$1 - e^{-\bar{n}_{Ab}(1+s_{Ab})p_{\text{est}}^{(Ab)}} \times e^{-\frac{uN_0}{-s_{ab}}(1+s_{Ab})p_{\text{est}}^{(Ab)}}. \tag{S3.19}$$

284 Combination with Eq. (S3.10) yields again the total probability of evolutionary rescue:

$$\begin{aligned}
P_{\text{rescue}} = 1 - F_{AB} &\left( e^{-(1+s_{AB})(1-r)} p_{\text{est}}^{(AB)} \right) \times e^{-\left( r \frac{\bar{n}_{Ab} \bar{n}_{aB}}{N_0} (1+s_{AB}) + u(\bar{n}_{Ab} + \bar{n}_{aB})(1+s_{AB})(1-r) \right) p_{\text{est}}^{(AB)}} \\
&\times e^{-(\bar{n}_{Ab} + \frac{uN_0}{-s_{ab}})(1+s_{Ab})p_{\text{est}}^{(Ab)}}. \tag{S3.20}
\end{aligned}$$

285 As before, we can compare the different pathways to rescue, (a) from double mutants from the  
 286 standing genetic variation, (b) mutation of single mutants from the standing genetic variation  
 287 after the change in the environment, (c) complete de-novo generation via the wildtype after the  
 288 environmental switch. Pathway (c) is more important than pathway (b) if

$$-s_{ab} < -\sigma_{Ab}. \quad (\text{S3.21})$$

289 Pathway (b) is more important than pathway (a) if

$$-s_{Ab} < -\sigma_{Ab}. \quad (\text{S3.22})$$

290 If  $s_{Ab} > 0$ , analogous to the previous paragraph, formation of the double mutant after the  
 291 environmental change cannot be ignored if

$$\begin{aligned}
 & 2s_{Ab} \ll p_{\text{est}}^{(Ab)} \\
 \Leftrightarrow & 2s_{Ab} \ll s_{Ab} - u + \sqrt{(s_{Ab} - u)^2 + 4 \max((s_{AB} - r), 0)u} \\
 \Leftrightarrow & s_{Ab} + u \ll \sqrt{(s_{Ab} - u)^2 + 4 \max((s_{AB} - r), 0)u} \quad (\text{S3.23}) \\
 \stackrel{s_{Ab} \gg u}{\Leftrightarrow} & s_{Ab} \ll \sqrt{s_{Ab}^2 + 4s_{AB}u} = s_{Ab} \cdot \sqrt{1 + \frac{4 \max((s_{AB} - r), 0)u}{s_{Ab}^2}} \\
 \Leftrightarrow & 4 \max((s_{AB} - r), 0)u \gg s_{Ab}^2.
 \end{aligned}$$

292 Altogether, it cannot be ignored if

$$\begin{aligned}
& 2s_{Ab} \frac{uN_0}{-\sigma} \ll p_{\text{est}}^{(Ab)} \frac{uN_0}{-\sigma} + \max[2(s_{AB} - r), 0] \frac{u^2 N_0}{\sigma^2} \frac{r - 2\sigma}{r - 2\sigma - E_1} \\
\Leftrightarrow & 2s_{Ab} \ll s_{Ab} - u + \sqrt{(s_{Ab} - u)^2 + 4 \max[(s_{AB} - r), 0]u} + \max[2(s_{AB} - r), 0] \frac{u^2 N_0}{\sigma^2} \frac{r - 2\sigma}{r - 2\sigma - E_1} \\
\Leftrightarrow & s_{Ab} + u \ll \sqrt{(s_{Ab} - u)^2 + 4 \max[(s_{AB} - r), 0]u} + \max[2(s_{AB} - r), 0] \frac{u^2 N_0}{\sigma^2} \frac{r - 2\sigma}{r - 2\sigma - E_1} \\
\stackrel{s_{Ab} \gg u}{\Leftrightarrow} & s_{Ab} \ll s_{Ab} \cdot \sqrt{1 + \frac{4 \max[(s_{AB} - r), 0]u}{s_{Ab}^2}} + \max[2(s_{AB} - r), 0] \frac{u^2 N_0}{\sigma^2} \frac{r - 2\sigma}{r - 2\sigma - E_1} \\
\Leftrightarrow & 4 \max[(s_{AB} - r), 0]u \gg s_{Ab}^2 \quad \text{or} \quad \max[2(s_{AB} - r), 0] \frac{u^2 N_0}{\sigma^2} \frac{r - 2\sigma}{r - 2\sigma - E_1} \gg s_{Ab}.
\end{aligned} \tag{S3.24}$$

### 293 S3.3 Both single mutants are viable

294 Finally, we consider the case  $s_{Ab} = s_{aB} = s > -1$ . With  $\sigma_{Ab} = \sigma_{aB} = \sigma$ , deterministically, the  
295 number of  $Ab$  mutants and  $aB$  mutants is hence equal at any point of time. In the following,  
296 we formulate equations in terms of type  $Ab$ .

297 **The wildtype is lethal** Ignoring recombination, from generation 0 to generation 1, the  
298 number of  $Ab$  individuals changes to

$$n_{Ab}(1) = (\bar{n}_{Ab}(1 - 2u) + uN_0)(1 + s). \tag{S3.25}$$

299 From then on, it evolves according to the recursive equation

$$\begin{aligned} n_{Ab}(t+1) &= (1+s)(1-2u) \left( n_{Ab}(t) - r \frac{n_{Ab}(t)n_{aB}(t)}{n_{Ab}(t) + n_{aB}(t)} \right) \\ &= (1+s)(1-2u) \left( n_{Ab}(t) - \frac{r}{2}n_{Ab}(t) \right), \end{aligned} \quad (\text{S3.26})$$

300 where the second line holds since  $n_{Ab}(t) = n_{aB}(t)$ . With this, we have

$$n_{Ab}(t+1) = n_{Ab}(1) \left( (1+s)(1-2u) \left( 1 - \frac{r}{2} \right) \right)^t. \quad (\text{S3.27})$$

301 From generation 1 on, the number of newly generated  $AB$  individuals follows a Poisson distri-  
302 bution with parameter

$$\left( u(n_{Ab}(t) + n_{aB}(t)) + \frac{r}{2}n_{Ab}(t) \right) (1 + s_{AB}). \quad (\text{S3.28})$$

303 Putting all together and using again  $n_{Ab}(t) = n_{aB}(t)$ , we obtain for rescue from generation 1  
304 on:

$$1 - e^{-\sum_{t=0}^{\infty} (2u + \frac{r}{2})n_{Ab}(t+1)(1+s_{AB})p_{\text{est}}^{(AB)}}. \quad (\text{S3.29})$$

305 With

$$\sum_{t=0}^{\infty} n_{Ab}(t+1) = \sum_{t=0}^{\infty} n_{Ab}(1) \left( (1+s)(1-2u) \left( 1 - \frac{r}{2} \right) \right)^t = n_{Ab}(1) \frac{1}{1 - (1+s)(1-2u) \left( 1 - \frac{r}{2} \right)}, \quad (\text{S3.30})$$

306 this yields

$$1 - e^{-\left(\frac{(1+s_{AB})(2u+\frac{r}{2})n_{Ab}(1)}{1-(1+s)(1-2u)(1-\frac{r}{2})}\right)p_{\text{est}}^{(AB)}} \approx 1 - e^{-2s_{AB}\frac{r}{2}\frac{uN_0(1+s)}{r+2u-s}}. \quad (\text{S3.31})$$

307 Combining with Eq. (S3.1), we obtain for the total probability of evolutionary rescue

$$P_{\text{rescue}} = 1 - F_{AB}(e^{-(1+s_{AB})(1-r)p_{\text{est}}^{(AB)}}) \times e^{-\left(r\frac{\bar{n}_{Ab}\bar{n}_{aB}}{N_0}(1+s_{AB})+u(\bar{n}_{Ab}+\bar{n}_{aB})(1+s_{AB})(1-r)\right)p_{\text{est}}^{(AB)}} \times e^{-\left(\frac{(1+s_{AB})(2u+\frac{r}{2})n_{Ab}(1)}{1-(1+s)(1-2u)(1-\frac{r}{2})}\right)p_{\text{est}}^{(AB)}}. \quad (\text{S3.32})$$

308 **The wildtype is as fit as the single mutants** As a second scenario, we consider the special  
 309 case  $s_{ab} = s_{Ab} = s_{aB} = s$ . If we ignore mating between single mutants (note that unlike in the  
 310 previous scenario, they are now relatively rare), we obtain for the deterministic dynamics

$$n_{ab}(t+1) = (1+s)(n_{ab}(t) - 2un_{ab}(t)), \quad (\text{S3.33a})$$

$$n_{Ab}(t+1) = (1+s)(n_{Ab}(t) + un_{ab}(t)), \quad (\text{S3.33b})$$

$$n_{aB}(t+1) = (1+s)(n_{aB}(t) + un_{ab}(t)) \quad (\text{S3.33c})$$

313 with the solutions

$$n_{ab}(t) = \bar{n}_{ab}((1+s)(1-2u))^t, \quad (\text{S3.34a})$$

$$n_{Ab}(t) = n_{aB}(t) = \frac{1}{2} \left( N_0(1+s)^t - \bar{n}_{ab}((1+s)(1-2u))^t \right). \quad (\text{S3.34b})$$

315 Type  $AB$  is generated at rate

$$r \frac{n_{Ab}(t)n_{aB}(t)}{N(t)}(1 + s_{AB}) + u(n_{Ab}(t) + n_{aB}(t))(1 + s_{AB})(1 - r) \quad (\text{S3.35})$$

316 and establishes with probability  $p_{\text{est}}^{(AB)}$  as given by Eq. (S1.23). This yields for the probability  
317 of evolutionary rescue via this pathway

$$1 - e^{-\sum_{t=1}^{\infty} \left( r \frac{n_{Ab}(t)n_{aB}(t)}{N(t)}(1 + s_{AB}) + u(n_{Ab}(t) + n_{aB}(t))(1 + s_{AB})(1 - r) \right) p_{\text{est}}^{(AB)}}. \quad (\text{S3.36})$$

318 Evaluating the sums yields

$$\begin{aligned} & \sum_{t=1}^{\infty} \frac{n_{Ab}(t)n_{aB}(t)}{N(t)} \\ &= -\frac{N_0}{4s} - \frac{N_0 - \bar{n}_{Ab} - \bar{n}_{aB}}{2(1 - (1 + s)(1 - 2u))} + \frac{(N_0 - \bar{n}_{Ab} - \bar{n}_{aB})^2}{4N_0} \frac{1}{1 - (1 + s)(1 - 2u)^2} - \frac{\bar{n}_{Ab}\bar{n}_{aB}}{N_0}. \end{aligned} \quad (\text{S3.37a})$$

319

$$\sum_{t=1}^{\infty} (n_{Ab}(t) + n_{aB}(t)) = -\frac{N_0}{s} - \frac{N_0 - \bar{n}_{Ab} - \bar{n}_{aB}}{1 - (1 + s)(1 - 2u)} - \bar{n}_{Ab} - \bar{n}_{aB}. \quad (\text{S3.37b})$$

320 Putting it all together, we obtain:

$$\begin{aligned} P_{\text{rescue}} &= 1 - F\left(e^{-(1+s_{AB})(1-r)p_{\text{est}}^{(AB)}}\right) \times e^{-\left(r \frac{\bar{n}_{Ab}\bar{n}_{aB}}{N_0}(1+s_{AB}) + u(\bar{n}_{Ab} + \bar{n}_{aB})(1+s_{AB})(1-r)\right)p_{\text{est}}^{(AB)}} \\ &\quad \times e^{-\left(r(1+s_{AB}) \sum_{t=1}^{\infty} \frac{n_{Ab}(t)n_{aB}(t)}{N(t)} + u(1-r)(1+s_{AB}) \sum_{t=1}^{\infty} (n_{Ab}(t) + n_{aB}(t))\right)p_{\text{est}}^{(AB)}}. \end{aligned} \quad (\text{S3.38})$$

321 **The wildtype is fitter than the single mutants** If  $s_{Ab} = s_{aB} = s$  and  $s_{ab} > s$ , we can  
 322 proceed as in the previous section. The dynamics of the wildtype population are again given  
 323 by

$$n_{ab}(t) = \bar{n}_{ab}(1 + s_{ab})^t(1 - 2u)^t. \quad (\text{S3.39})$$

324 The dynamics of the single mutants follow

$$n_{Ab}(t + 1) = n_{aB}(t + 1) = (1 + s)(n_{Ab}(t) + un_{ab}(t)), \quad (\text{S3.40})$$

325 yielding

$$n_{Ab}(t) = \frac{(uN_0(1 + s) + \bar{n}_{Ab}(s - s_{ab}))(1 - 2u)(1 + s)^t - u\bar{n}_{ab}(1 + s)(1 + s_{ab})^t(1 - 2u)^t}{s - s_{ab} + 2u(1 + s_{ab})}. \quad (\text{S3.41})$$

326 With the approximations

$$\begin{aligned} C &:= s - s_{ab} + 2u(1 + s_{ab}), \\ \alpha &:= u\bar{n}_{ab}(1 + s), \end{aligned} \quad (\text{S3.42})$$

$$\beta := uN_0(1 + s) + \bar{n}_{Ab}(s - s_{ab})(1 - 2u),$$



327 and  $N(t) \approx n_{ab}(t)$  we obtain

$$\begin{aligned} \sum_{t=1}^{\infty} (n_{ab}(t) + n_{aB}(t)) &= \frac{\beta \sum_{t=1}^{\infty} (1+s)^t - \alpha \sum_{t=1}^{\infty} (1+s_{ab})^t (1-2u)^t}{C} \\ &= \frac{\beta \frac{1+s}{-s} - \alpha \frac{(1+s_{ab})(1-2u)}{1-(1+s_{ab})(1-2u)}}{C} \end{aligned} \quad (\text{S3.43a})$$

$$\begin{aligned} \sum_{t=1}^{\infty} \frac{n_{Ab}(t)n_{aB}(t)}{N(t)} &= \frac{\alpha^2(1+s_{ab})^{2t}(1-2u)^{2t} - 2\alpha\beta(1+s_{ab})^t(1-2u)^t(1+s)^t + \beta^2(1+s)^{2t}}{C^2\bar{n}_{ab}(1+s_{ab})^t(1-2u)^t} \\ &= \frac{1}{C^2\bar{n}_{ab}} \left( \alpha^2 \frac{(1+s_{ab})(1-2u)}{1-(1+s_{ab})(1-2u)} - 2\alpha\beta \frac{1+s}{-s} + \beta^2 \frac{(1+s)^2}{(1+s_{ab})(1-2u) - (1+s)^2} \right). \end{aligned} \quad (\text{S3.43b})$$

329 Since the wildtype dominates at all times (unless rescue has occurred), we can again approxi-  
330 mate  $p_{\text{est}}^{(AB)} = 2 \max[(s_{AB} - r), 0]$ .

331 Fig. S3.3 shows  $P_{\text{rescue}}$  for various values of  $s_{ab}$  with all other parameter values as in Fig. 3C.

### 332 S3.4 Both single mutants have fitness greater than one

333 We here formalize the special case  $s_{ab} = -1$ ,  $s_{Ab} = s_{aB} = s > 0$ . For this, we consider pairs  
334 consisting out of one  $Ab$  and one  $aB$  mutant. Such a pair reproduces at rate  $\frac{1}{2} + \hat{s}$  and dies at  
335 rate  $\frac{1}{2} - \hat{s}$  with  $\hat{s} = \ln(1+s)$ . At rate  $\frac{r}{2}(1+s_{AB})$ , it turns into an individual of type  $AB$  (this  
336 ignores mutation). The growth rate of a pair is  $2\hat{s}$ , since in reality, we are not interested in  
337 pairs but establishment of any type ( $Ab$ ,  $aB$ ,  $AB$ ) is fine, and each single mutant has growth  
338 rate  $s$ . However, it is pairs that convert into double mutants, and with this approximation,

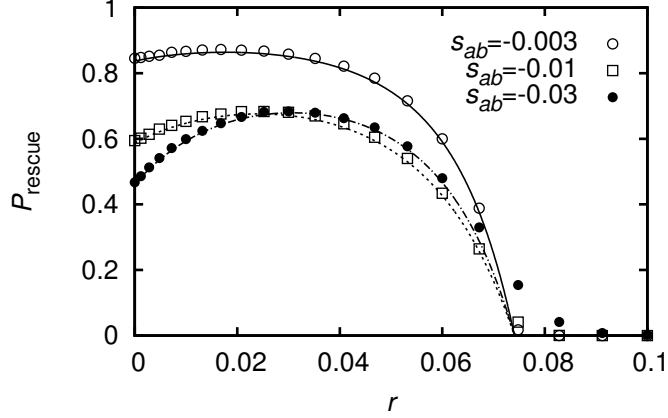

**Fig. S3.3: Probability of evolutionary rescue as a function of recombination for various values of  $s_{ab}$ .** All other parameter values are chosen as in Fig. 3C. Theoretical predictions are based on Eq. (S3.38) with Eq. (S3.43a). Symbols denote simulation results. Each simulation point is the average of  $5 \cdot 10^4$  replicates. For the simulations with  $s_{ab} = -0.003$ , we considered a population as rescued when the number of double mutants reached  $0.2N_0$  (changing the criterion to  $0.3N_0$  did not alter the results).

339 we assume that for every single mutant of type  $Ab$ , there is a single mutant of type  $aB$  to  
 340 recombine with and vice versa. A single individual of type  $AB$  establishes a permanent lineage  
 341 with probability  $p_{\text{est}}^{(AB)} \approx 2s_{AB}$ . Using Eq. (S1.8), we can calculate the survival probability of a  
 342 process founded by exactly one pair:

$$\begin{aligned}
 p_{\text{est}}^{(Ab,aB)} &= 1 - \frac{1 + \hat{s} + \frac{r}{2}(1 + s_{AB}) - \sqrt{(\hat{s} - \frac{r}{2}(1 + s_{AB}))^2 + (1 + 2\hat{s})r(1 + s_{AB})} p_{\text{est}}^{(AB)}}{1 + 2\hat{s}} \\
 &\approx 2s - \frac{r}{2} + \sqrt{\left(2s - \frac{r}{2}\right)^2 + 2s_{AB}r}.
 \end{aligned}
 \tag{S3.44}$$

343 The probability of evolutionary rescue from generation 1 on is given by

$$1 - e^{-\bar{n}_{Ab}(1+s_{Ab})p_{\text{est}}^{(Ab,aB)}}.
 \tag{S3.45}$$

344 Neglecting the contribution of double mutants from the standing genetic variation to rescue,  
 345 the possibility to generate the double mutant has a significant effect if either

$$p_{\text{est}}^{(Ab,aB)} \gg 4s \quad \text{or} \quad p_{\text{est}}^{(Ab,aB)} \ll 4s. \quad (\text{S3.46})$$

346 These conditions simplify in few steps to

$$s_{AB} \gg 2s \quad \text{or} \quad s_{AB} \ll 2s. \quad (\text{S3.47})$$

### 347 **S3.5 Two-step rescue vs single-step rescue**

348 We briefly discuss some instances where two-step rescue (as analyzed in this paper) is more  
 349 likely to happen than single-step rescue (where there are only two types – the wildtype and the  
 350 rescue type – and a single mutational step between them). For easier comparison, we denote  
 351 the wildtype by  $ab$  and the rescue genotype by  $AB$  for single-step rescue as well. Mutation  
 352 from wildtype to rescue mutants may happen with probability  $u_s$ . With Eq. (S1.4), the p.g.f.  
 353 for the number of rescue mutations in the standing genetic variation is derived to be

$$F_{AB}^{\text{ssr}}(y) = \left( \frac{2\sigma_{AB}}{y + \sigma_{AB}y + \sigma_{AB} - 1} \right)^{2u_s N_0}. \quad (\text{S3.48})$$

354 The probability of evolutionary rescue for single-step rescue is given by

$$\begin{aligned}
P_{\text{rescue}}^{\text{SSR}} &= 1 - F_{AB}^{\text{SSR}}(e^{-(1+s_{AB})p_{\text{est}}^{(AB)}})e^{-\frac{u_s N_0}{-s_{ab}}(1+s_{AB})p_{\text{est}}^{(AB)}} \\
&= 1 - e^{-p_{\text{est}}^{(AB)}(1+s_{AB})\left[\frac{u_s N_0}{-\sigma_{AB}}(1+\sigma_{AB}) - \frac{u_s N_0}{-s_{ab}}\right]} \approx 1 - e^{-2s_{AB}\left[\frac{u_s N_0}{-\sigma_{AB}} - \frac{u_s N_0}{-s_{ab}}\right]}.
\end{aligned}
\tag{S3.49}$$

355 where the first summand in the brackets accounts for the contribution of standing genetic  
356 variation and the second one for new mutations after the environmental change (cf. also ORR  
357 and UNCKLESS (2008, 2014); BELL and COLLINS (2008); UECKER *et al.* (2014)).

358 In the following, we focus on scenarios where the wildtype is lethal in the new environment and  
359 approximate single-step rescue by

$$P_{\text{rescue}}^{\text{sgv}} \approx 1 - e^{-2s_{AB}\frac{u_s N_0}{-\sigma_{AB}}}. \tag{S3.50}$$

360 **Lethal single mutants** For two-step rescue, we use approximation Eq. (8):

$$P_{\text{rescue}} \approx 1 - e^{-2s_{AB}\frac{u^2 N_0}{\sigma^2}\frac{r-2\sigma}{r-2\sigma-E_1}} \underset{r \text{ large}/E_1 = 0}{\approx} 1 - e^{-2s_{AB}\frac{u^2 N_0}{\sigma^2}}. \tag{S3.51}$$

361 Comparing with Eq. (S3.50) shows that two-step rescue is more likely if

$$\frac{u^2}{\sigma^2}\frac{r-2\sigma}{r-2\sigma-E_1} > \frac{u_s}{-\sigma_{AB}}. \tag{S3.52}$$

362 For large recombination, this reduces to

$$\frac{u^2}{\sigma^2} > \frac{u_s}{-\sigma_{AB}}. \quad (\text{S3.53})$$

363 For  $E_1 = 0$  (which implies  $\sigma_{AB} \approx 2\sigma$ ):

$$\frac{u^2}{-\sigma} > \frac{u_s}{2}. \quad (\text{S3.54})$$

364 **One viable single mutant** Following section S3.2, two-step rescue can be approximated by

$$1 - e^{-2s_{AB} \frac{u^2 N_0}{\sigma^2} \frac{r-2\sigma}{r-2\sigma-E_1}} \times e^{-\frac{uN_0}{-\sigma} \frac{2s_{AB}u}{-s_{Ab}}}. \quad (\text{S3.55})$$

365 Under these conditions, two-step rescue is more likely than single-step rescue if

$$\frac{u^2}{\sigma^2} \frac{r-2\sigma}{r-2\sigma-E_1} + \frac{u^2}{\sigma s_{Ab}} > \frac{u_s}{-\sigma_{AB}}. \quad (\text{S3.56})$$

366 Again, for strong recombination:

$$\frac{u^2}{\sigma^2} + \frac{u^2}{\sigma s_{Ab}} > \frac{u_s}{-\sigma_{AB}}. \quad (\text{S3.57})$$

367 And for  $E_1 = 0$ :

$$\frac{u^2}{-\sigma} + \frac{u^2}{-s_{Ab}} > \frac{u_s}{2}. \quad (\text{S3.58})$$

368 **Viable single mutants** Last, we consider a scenario with both single mutants viable. With  
 369 Eq. (10), the probability of evolutionary rescue is given by

$$1 - e^{-2s_{AB} \frac{u^2 N_0}{\sigma^2} \frac{r-2\sigma}{r-2\sigma-E_1}} \times e^{-2s_{AB} \frac{uN_0}{-\sigma} (1+s_{Ab}) \frac{r}{r-2s_{Ab}}}. \quad (\text{S3.59})$$

370 This yields for the condition that two-step rescue is more likely than single-step rescue

$$\frac{u^2}{\sigma^2} \frac{r-2\sigma}{r-2\sigma-E_1} + (1+s_{Ab}) \frac{u}{-\sigma} \frac{r}{r-2s_{Ab}} > \frac{u_s}{-\sigma_{AB}}, \quad (\text{S3.60})$$

371 which for strong recombination simplifies to

$$\frac{u}{-\sigma} \left( \frac{u}{-\sigma} + (1+s_{Ab}) \frac{r}{r-2s_{Ab}} \right) > \frac{u_s}{-\sigma_{AB}}. \quad (\text{S3.61})$$

372 For  $E_1 = 0$ :

$$\frac{u^2}{-\sigma} + (1+s_{Ab}) \frac{ur}{r-2s_{Ab}} > \frac{u_s}{2}. \quad (\text{S3.62})$$

## 373 **S4 Limits of the approximations**

374 Our approximations assume that wildtype individuals and single mutants are sufficiently fre-  
 375 quent to describe their dynamics deterministically. This requires a sufficiently large population  
 376 size and a sufficiently high fitness of single mutants prior to the change in the environment.  
 377 Fig. S4.4 takes Fig. 3A as a starting point and varies several parameters in order to probe

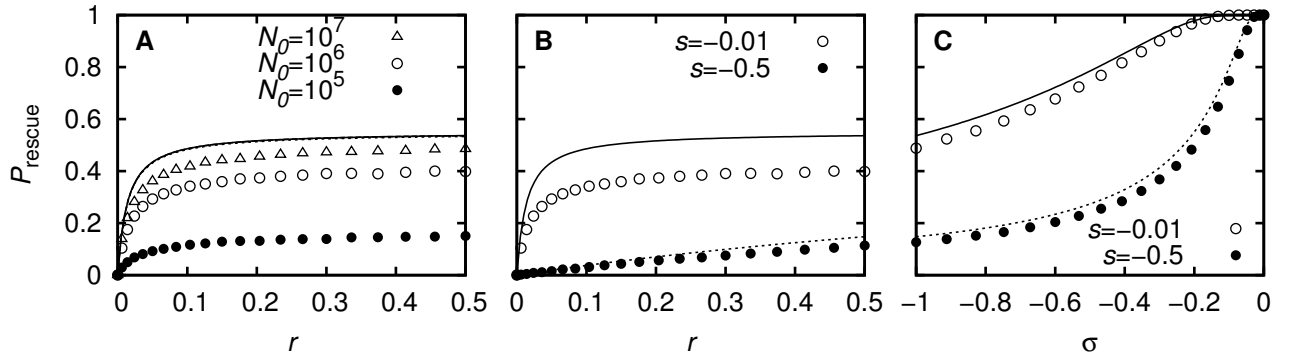

**Fig. S4.4:** Probability of evolutionary rescue as a function of recombination for various population sizes  $N_0$  with  $N_0 s_{AB} = 2000$  kept constant (Panel A), recombination  $r$  for various values of  $s$  (Panel B), and the strength of selection against single mutants in the old environment  $\sigma$  (Panel C). The figure varies parameters from Fig. 3A. For all Panels:  $u = 2 \cdot 10^{-6}$ ,  $\sigma_{AB} = -0.1$ ,  $s_{ab} = -1$ . Panel A:  $N_0 s_{AB} = 2000$ ,  $\sigma = -0.01$ ,  $s = -0.01$ ; Panel B:  $s_{AB} = 0.002$ ,  $\sigma = -0.01$ ,  $N_0 = 10^6$ ; Panel C:  $s_{AB} = 0.002$ ,  $r = 0.5$ ,  $N_0 = 10^8$ . Symbols denote simulation results. Each simulation point is the average of  $5 \cdot 10^4$  replicates.

378 the limits of the approximations. Panel A shows  $P_{\text{rescue}}$  for various initial population sizes  $N_0$   
379 with the product  $N_0 s_{AB}$  kept constant such that the theoretical predictions virtually coincide.  
380 However, as the population size gets smaller, simulation results greatly deviate from this pre-  
381 diction. Note that the number of single mutants for  $N_0 = 10^5$  is as low as  $\bar{n}_{Ab} = \bar{n}_{aB} = 20$ .  
382 While in Panel A the number of single mutants in the standing genetic variation differs for  
383 different population sizes, it is – on average – the same at the right edge of Panel B ( $N_0 = 10^6$ ,  
384  $\sigma = -0.01$ ) and the left edge of Panel C ( $N_0 = 10^8$ ,  $\sigma = -1$ ) but stochasticity is higher in  
385 Panel B, leading to larger deviations between the analytical prediction and simulation results.

## References

- ALLEN, L. J. S., 2011 *An Introduction to Stochastic Processes with Applications to Biology*.  
Pearson Education, Inc., New Jersey, second edition.
- BELL, G., and S. COLLINS, 2008 Adaptation, extinction and global change. *Evolutionary Applications* **1(1)**: 3–16.
- IWASA, Y., F. MICHOR, and M. A. NOWAK, 2003 Evolutionary dynamics of escape from  
biomedical intervention. *Proceedings of the Royal Society B* **270**: 2573–2578.
- IWASA, Y., F. MICHOR, and M. A. NOWAK, 2004 Evolutionary dynamics of invasion and  
escape. *Journal of Theoretical Biology* **226**: 205–214.
- KENDALL, D. G., 1948 On the generalized "birth-and-death" process. *The Annals of Mathe-  
matical Statistics* **19(1)**: 1–15.
- ORR, H. A., and R. L. UNCKLESS, 2008 Population extinction and the genetics of adaptation.  
*The American Naturalist* **172(2)**: 160 – 169.
- ORR, H. A., and R. L. UNCKLESS, 2014 The population genetics of evolutionary rescue. *PLoS  
Genetics* **10(8)**: e1004551.
- SEWASTJANOW, B. A., 1974 *Verzweigungsprozesse*. Akademie-Verlag, Berlin.
- UECKER, H., and J. HERMISSON, 2011 On the fixation process of a beneficial mutation in a  
variable environment. *Genetics* **188**: 915–930.



404 UECKER, H., S. OTTO, and J. HERMISSON, 2014 Evolutionary rescue in structured popula-  
405 tions. *The American Naturalist* **183**: E17–E35.

406 UECKER, H., D. SETTER, and J. HERMISSON, 2015 Adaptive gene introgression after sec-  
407 ondary contact. *Journal of Mathematical Biology* **70(7)**: 1523–1580.
